# Supplementary material
Source: ML conference proceedings conference paper supplement (https://openaccess.thecvf.com/content/CVPR2023/html/Li_Diffusion-SDF_Text-To-Shape_via_CVPR_2023_paper.html)
Supplement: Supplementary file 1 [file Li_Diffusion-SDF_Text-To-Shape_via_CVPR_2023_supplemental.pdf]

## ***Supplementary Material: Diffusion-SDF: Text-to-Shape via Voxelized Diffusion***

### **1. Qualitative Results**

In this section, we provide more qualitative illustrations for the generation results based on our proposed *Diffusion-SDF* approach. Figure 1 shows some extra diversified generated samples for text-conditioned shape generation. Figure 2 displays further text-conditioned shape completion results based on different input shapes. Figure 3 illustrates several text-conditioned shape manipulation results from diverse initial shapes. Results are displayed in the next few pages.

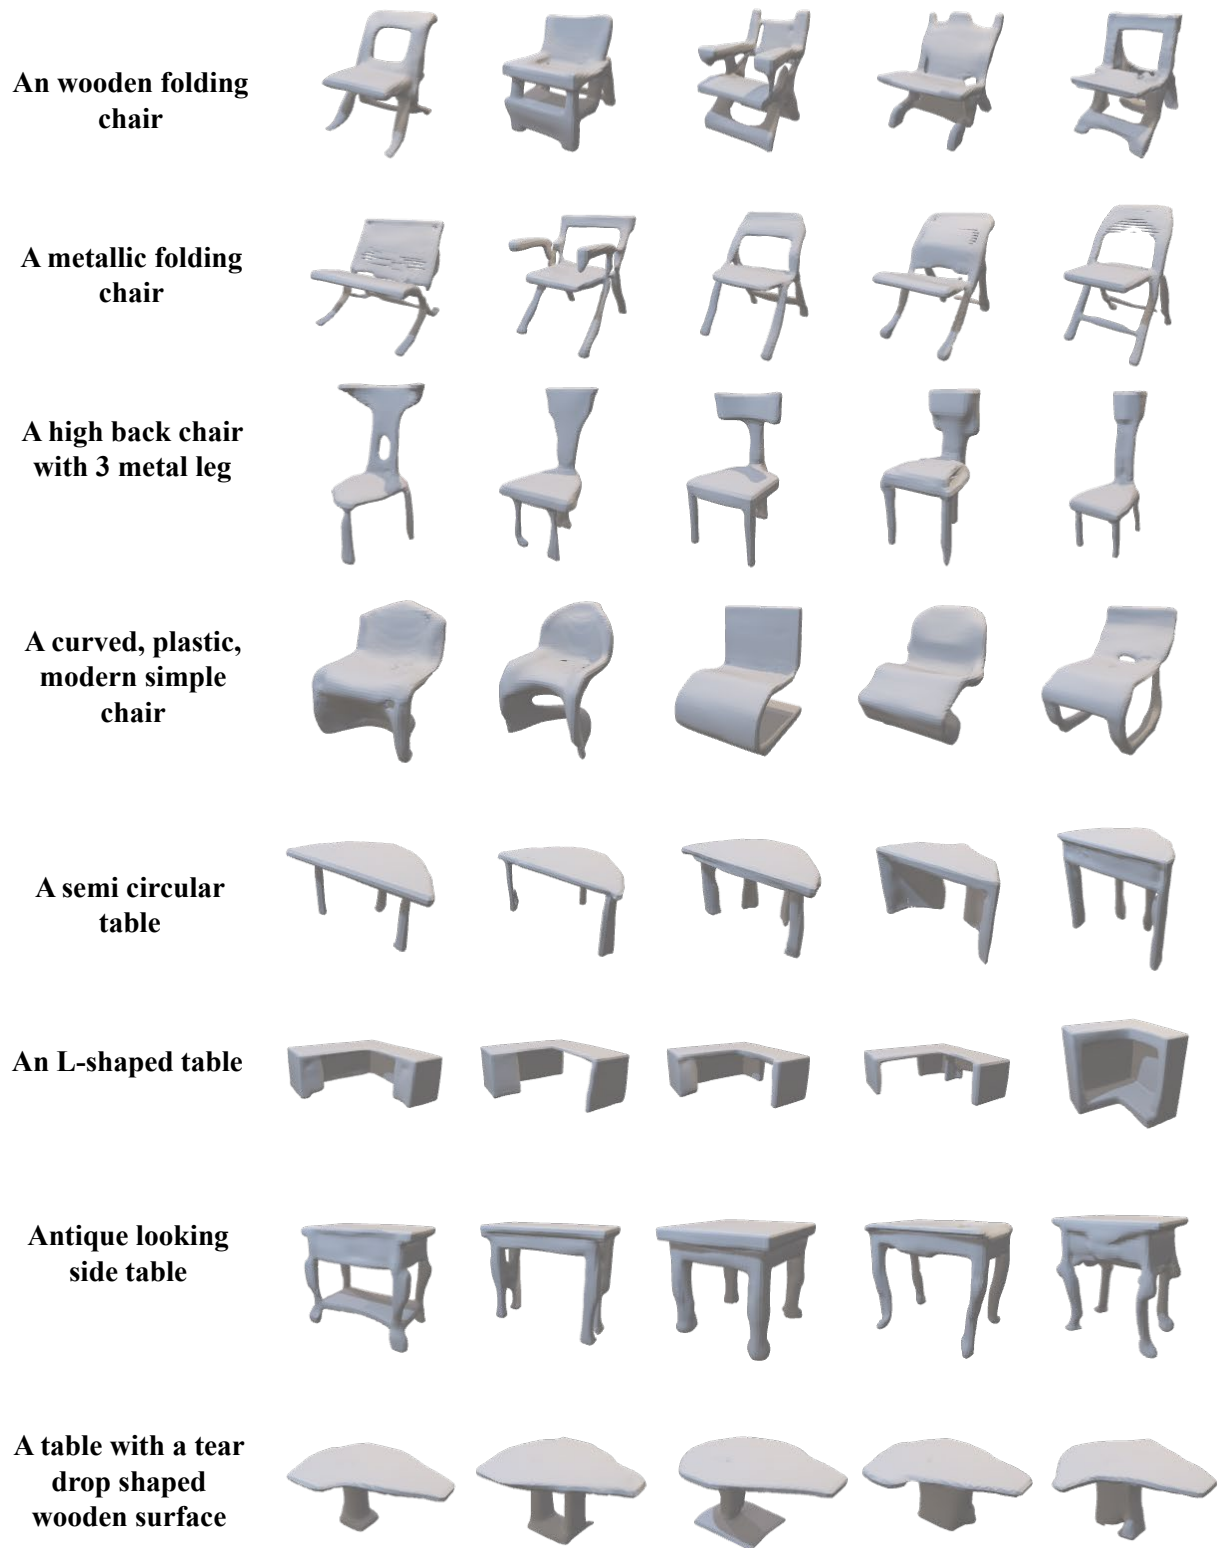

Figure 1. More illustrations on diversified text-to-shape generation.

**Given shape**

**A sofa**

**A ball chair**

**A straight chair**

**A toilet**

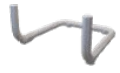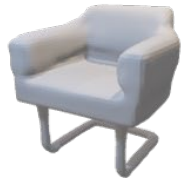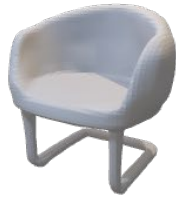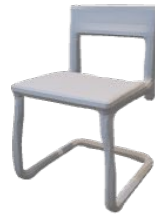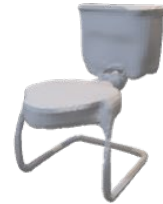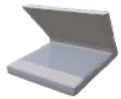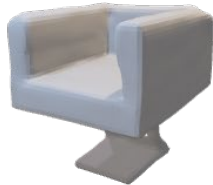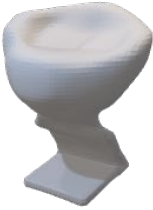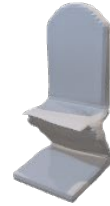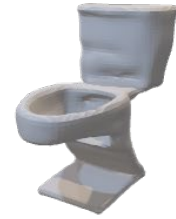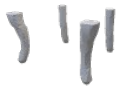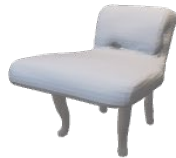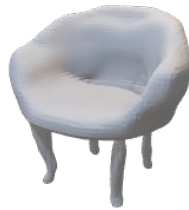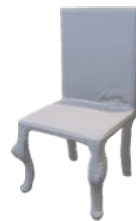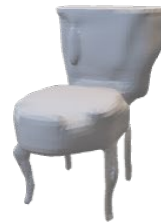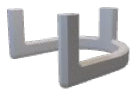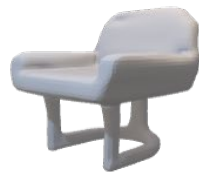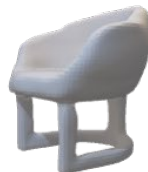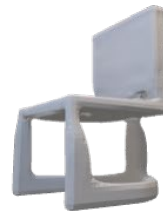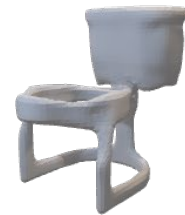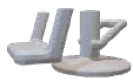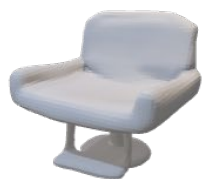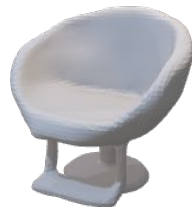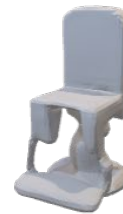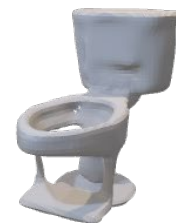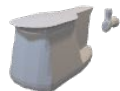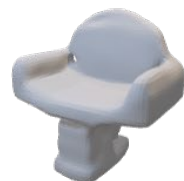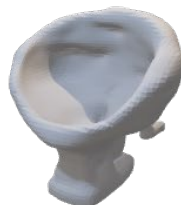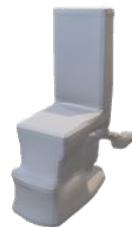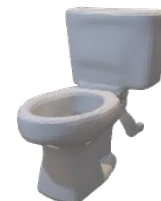

Figure 2. More illustrations on text-conditioned shape completion.

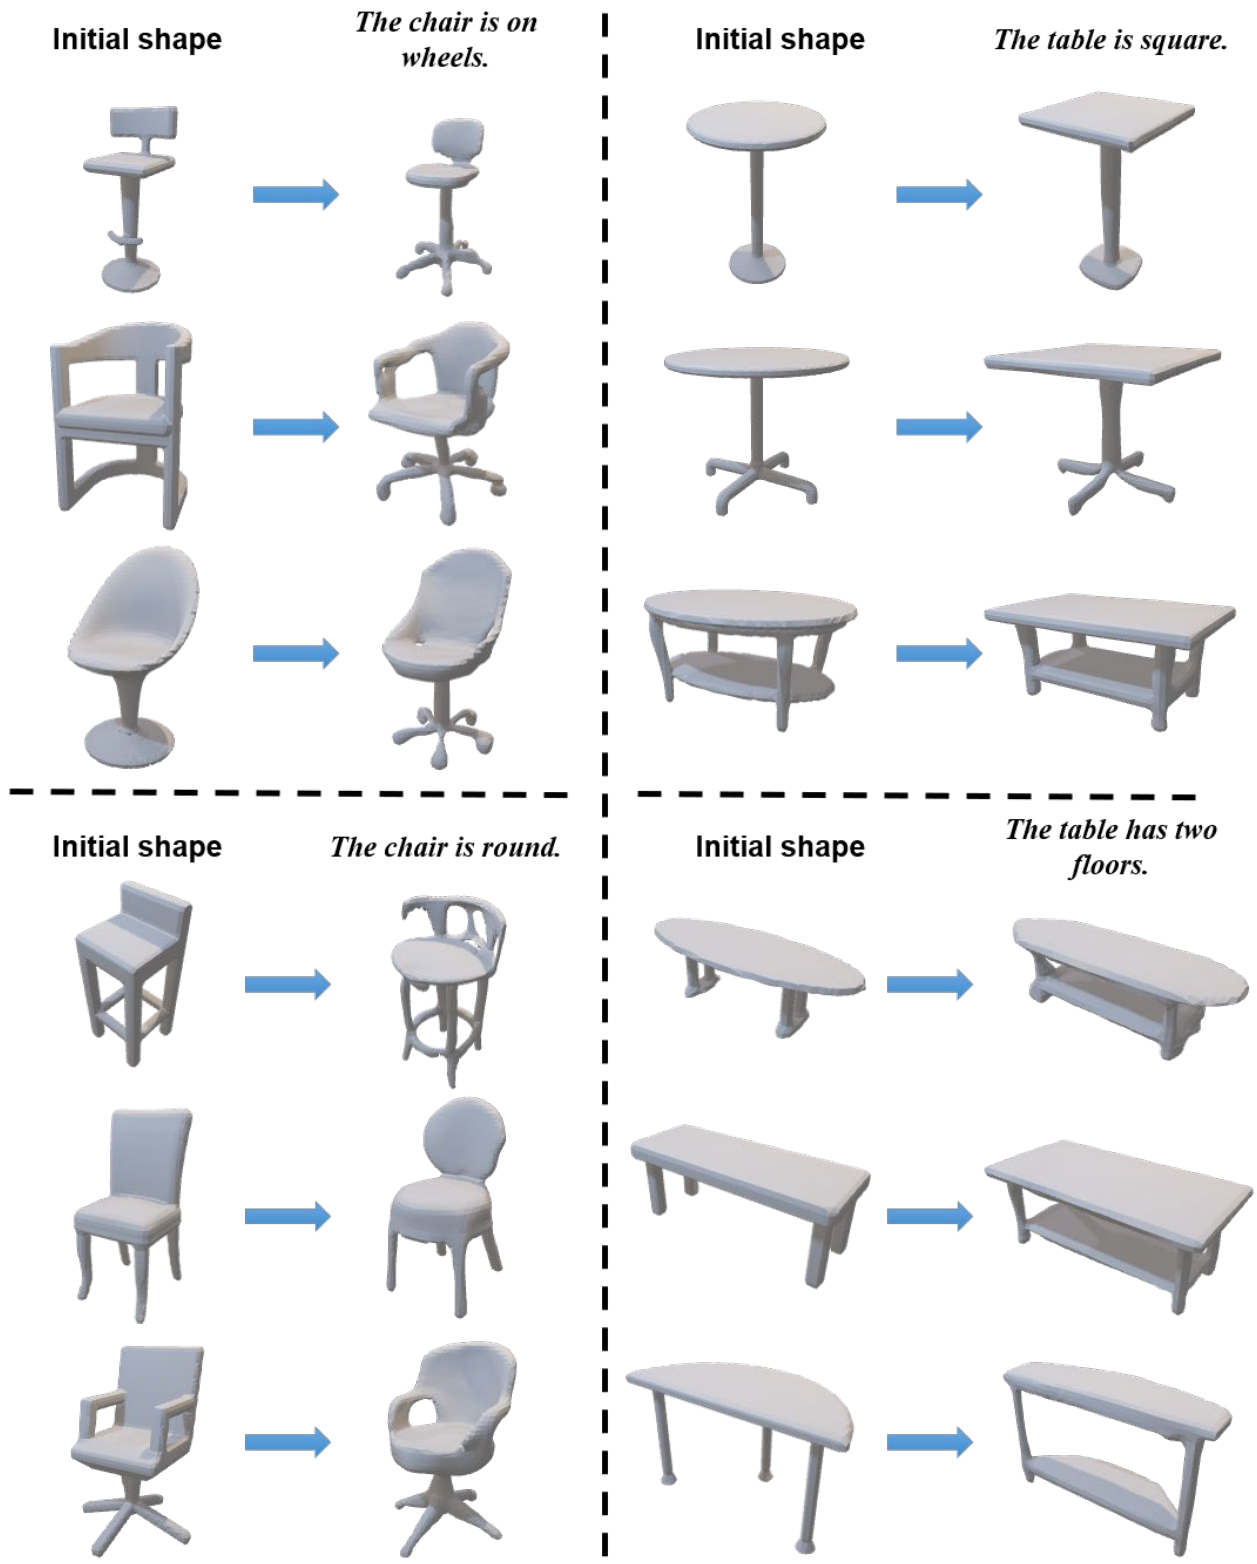

Figure 3. More illustrations on text-conditioned shape manipulation.
